# Supplementary material for: Full-length transcriptome profiling of Gentiana straminea Maxim. provides new insights into iridoid biosynthesis pathway
Source: PeerJ. 2025 Oct 23;13:e20136. doi: 10.7717/peerj.20136 (PMC12554311; doi:10.7717/peerj.20136)
Supplement: Supplemental Information 17 [file peerj-13-20136-s017.xlsx]

## Sheet: Sheet1
Supplementary FileS2. Functional annotation of final isoforms
ID	Nr-Score	Nr-Evalue	Nr-annotation	Swissprot-Score	Swissprot-Evalue	Swissprot-annotation	KOG-Score	KOG-Evalue	KOG-Function-Description	KEGG-Evalue	KEGG-Score	KEGG-Pathway	KEGG_annotation	Symbol
Isoform0027033	766.1	9.1e-219	AJT35503.1 acetyl-CoA acetyltransferase [Gentiana rigescens]	680.2	2e-194	sp|Q8S4Y1|THIC1_ARATH Acetyl-CoA acetyltransferase, cytosolic 1 OS=Arabidopsis thaliana OX=3702 GN=AAT1 PE=1 SV=1	680.2	3e-195	Acetyl-CoA acetyltransferase	2.2e-201	706.4	;ko00650//Butanoate metabolism//Carbohydrate metabolism//Metabolism	acetyl-CoA acetyltransferase; K00626 ACAT; acetyl-CoA C-acetyltransferase [EC:2.3.1.9]	ACAT
Isoform0027304	674.9	2.7e-191	XP_027185542.1 probable acetyl-CoA acetyltransferase, cytosolic 2 isoform X2 [Coffea eugenioides]	638.6	6.7e-182	sp|Q9FIK7|THIC2_ARATH Probable acetyl-CoA acetyltransferase, cytosolic 2 OS=Arabidopsis thaliana OX=3702 GN=At5g47720 PE=2 SV=1	638.6	1e-182	Acetyl-CoA acetyltransferase	7.8e-191	671.4	;ko00650//Butanoate metabolism//Carbohydrate metabolism//Metabolism	acetyl-CoA acetyltransferase; K00626 ACAT; acetyl-CoA C-acetyltransferase [EC:2.3.1.9]	ACAT
Isoform0028393	766.1	8.3e-219	AJT35503.1 acetyl-CoA acetyltransferase [Gentiana rigescens]	680.2	1.8e-194	sp|Q8S4Y1|THIC1_ARATH Acetyl-CoA acetyltransferase, cytosolic 1 OS=Arabidopsis thaliana OX=3702 GN=AAT1 PE=1 SV=1	680.2	2.7e-195	Acetyl-CoA acetyltransferase	2e-201	706.4	;ko00650//Butanoate metabolism//Carbohydrate metabolism//Metabolism	acetyl-CoA acetyltransferase; K00626 ACAT; acetyl-CoA C-acetyltransferase [EC:2.3.1.9]	ACAT
Isoform0028490	766.9	5e-219	AJT35503.1 acetyl-CoA acetyltransferase [Gentiana rigescens]	680.6	1.5e-194	sp|Q8S4Y1|THIC1_ARATH Acetyl-CoA acetyltransferase, cytosolic 1 OS=Arabidopsis thaliana OX=3702 GN=AAT1 PE=1 SV=1	680.6	2.2e-195	Acetyl-CoA acetyltransferase	1.2e-201	707.2	;ko00650//Butanoate metabolism//Carbohydrate metabolism//Metabolism	acetyl-CoA acetyltransferase; K00626 ACAT; acetyl-CoA C-acetyltransferase [EC:2.3.1.9]	ACAT
Isoform0028763	493.8	7.8e-137	XP_027185539.1 acetyl-CoA acetyltransferase, cytosolic 1 isoform X1 [Coffea eugenioides]	474.9	1.2e-132	sp|Q9FIK7|THIC2_ARATH Probable acetyl-CoA acetyltransferase, cytosolic 2 OS=Arabidopsis thaliana OX=3702 GN=At5g47720 PE=2 SV=1	474.9	1.7e-133	Acetyl-CoA acetyltransferase	6.5e-136	488.8	;ko00650//Butanoate metabolism//Carbohydrate metabolism//Metabolism	acetyl-CoA acetyltransferase; K00626 ACAT; acetyl-CoA C-acetyltransferase [EC:2.3.1.9]	ACAT
Isoform0023461	459.5	2.1e-126	XP_027085226.1 hydroxymethylglutaryl-CoA synthase-like [Coffea arabica]	394.8	1.9e-108	sp|P54873|HMCS_ARATH Hydroxymethylglutaryl-CoA synthase OS=Arabidopsis thaliana OX=3702 GN=HMGS PE=1 SV=2	394.8	2.9e-109	Hydroxymethylglutaryl-CoA synthase	8.5e-125	452.2	;ko00650//Butanoate metabolism//Carbohydrate metabolism//Metabolism	hydroxymethylglutaryl-CoA synthase-like; K01641 HMGCS; hydroxymethylglutaryl-CoA synthase [EC:2.3.3.10]	HMGCS
Isoform0024461	848.6	1.5e-243	XP_027085226.1 hydroxymethylglutaryl-CoA synthase-like [Coffea arabica]	768.5	6.2e-221	sp|P54873|HMCS_ARATH Hydroxymethylglutaryl-CoA synthase OS=Arabidopsis thaliana OX=3702 GN=HMGS PE=1 SV=2	768.5	9.3e-222	Hydroxymethylglutaryl-CoA synthase	1.1e-238	830.5	;ko00650//Butanoate metabolism//Carbohydrate metabolism//Metabolism	hydroxymethylglutaryl-CoA synthase-like; K01641 HMGCS; hydroxymethylglutaryl-CoA synthase [EC:2.3.3.10]	HMGCS
Isoform0025312	848.6	1.5e-243	XP_027085226.1 hydroxymethylglutaryl-CoA synthase-like [Coffea arabica]	768.1	7.9e-221	sp|P54873|HMCS_ARATH Hydroxymethylglutaryl-CoA synthase OS=Arabidopsis thaliana OX=3702 GN=HMGS PE=1 SV=2	768.1	1.2e-221	Hydroxymethylglutaryl-CoA synthase	1.1e-238	830.5	;ko00650//Butanoate metabolism//Carbohydrate metabolism//Metabolism	hydroxymethylglutaryl-CoA synthase-like; K01641 HMGCS; hydroxymethylglutaryl-CoA synthase [EC:2.3.3.10]	HMGCS
Isoform0025653	852.8	7.7e-245	XP_011072067.1 hydroxymethylglutaryl-CoA synthase [Sesamum indicum]	790.4	1.4e-227	sp|P54873|HMCS_ARATH Hydroxymethylglutaryl-CoA synthase OS=Arabidopsis thaliana OX=3702 GN=HMGS PE=1 SV=2	790.4	2.1e-228	Hydroxymethylglutaryl-CoA synthase	2e-245	852.8	;ko00650//Butanoate metabolism//Carbohydrate metabolism//Metabolism	hydroxymethylglutaryl-CoA synthase; K01641 HMGCS; hydroxymethylglutaryl-CoA synthase [EC:2.3.3.10]	HMGCS
Isoform0026479	852.8	7.3e-245	XP_011072067.1 hydroxymethylglutaryl-CoA synthase [Sesamum indicum]	790.8	1.1e-227	sp|P54873|HMCS_ARATH Hydroxymethylglutaryl-CoA synthase OS=Arabidopsis thaliana OX=3702 GN=HMGS PE=1 SV=2	790.8	1.6e-228	Hydroxymethylglutaryl-CoA synthase	1.9e-245	852.8	;ko00650//Butanoate metabolism//Carbohydrate metabolism//Metabolism	hydroxymethylglutaryl-CoA synthase; K01641 HMGCS; hydroxymethylglutaryl-CoA synthase [EC:2.3.3.10]	HMGCS
Isoform0027241	852.8	7.3e-245	XP_011072067.1 hydroxymethylglutaryl-CoA synthase [Sesamum indicum]	790.4	1.4e-227	sp|P54873|HMCS_ARATH Hydroxymethylglutaryl-CoA synthase OS=Arabidopsis thaliana OX=3702 GN=HMGS PE=1 SV=2	790.4	2e-228	Hydroxymethylglutaryl-CoA synthase	1.9e-245	852.8	;ko00650//Butanoate metabolism//Carbohydrate metabolism//Metabolism	hydroxymethylglutaryl-CoA synthase; K01641 HMGCS; hydroxymethylglutaryl-CoA synthase [EC:2.3.3.10]	HMGCS
Isoform0028325	503.4	1e-139	KAA8521966.1 hypothetical protein F0562_012720 [Nyssa sinensis]	473	4.7e-132	sp|P54873|HMCS_ARATH Hydroxymethylglutaryl-CoA synthase OS=Arabidopsis thaliana OX=3702 GN=HMGS PE=1 SV=2	473	7e-133	Hydroxymethylglutaryl-CoA synthase	1.9e-138	497.3	;ko00650//Butanoate metabolism//Carbohydrate metabolism//Metabolism	hydroxymethylglutaryl-CoA synthase-like; K01641 HMGCS; hydroxymethylglutaryl-CoA synthase [EC:2.3.3.10]	HMGCS
Isoform0029438	808.5	1.4e-231	XP_027085226.1 hydroxymethylglutaryl-CoA synthase-like [Coffea arabica]	730.7	1.2e-209	sp|P54873|HMCS_ARATH Hydroxymethylglutaryl-CoA synthase OS=Arabidopsis thaliana OX=3702 GN=HMGS PE=1 SV=2	730.7	1.7e-210	Hydroxymethylglutaryl-CoA synthase	6e-227	791.2	;ko00650//Butanoate metabolism//Carbohydrate metabolism//Metabolism	hydroxymethylglutaryl-CoA synthase; K01641 HMGCS; hydroxymethylglutaryl-CoA synthase [EC:2.3.3.10]	HMGCS
Isoform0030620	756.5	5.9e-216	AFN89599.1 3-hydro-3-methylglutary CoA reductase [Gentiana macrophylla]	583.9	1.6e-165	sp|P48020|HMDH1_SOLTU 3-hydroxy-3-methylglutaryl-coenzyme A reductase 1 OS=Solanum tuberosum OX=4113 GN=HMG1 PE=2 SV=1	546.2	5.5e-155	3-hydroxy-3-methylglutaryl-CoA (HMG-CoA) reductase	2.3e-172	609.8	;ko00900//Terpenoid backbone biosynthesis//Metabolism of terpenoids and polyketides//Metabolism	3-hydroxy-3-methylglutaryl-coenzyme A reductase; K00021 HMGCR; hydroxymethylglutaryl-CoA reductase (NADPH) [EC:1.1.1.34]	HMGCR
Isoform0031133	756.5	5.5e-216	AFN89599.1 3-hydro-3-methylglutary CoA reductase [Gentiana macrophylla]	583.9	1.5e-165	sp|P48020|HMDH1_SOLTU 3-hydroxy-3-methylglutaryl-coenzyme A reductase 1 OS=Solanum tuberosum OX=4113 GN=HMG1 PE=2 SV=1	546.2	5.2e-155	3-hydroxy-3-methylglutaryl-CoA (HMG-CoA) reductase	2.1e-172	609.8	;ko00900//Terpenoid backbone biosynthesis//Metabolism of terpenoids and polyketides//Metabolism	3-hydroxy-3-methylglutaryl-coenzyme A reductase; K00021 HMGCR; hydroxymethylglutaryl-CoA reductase (NADPH) [EC:1.1.1.34]	HMGCR
Isoform0011682	849	1.7e-243	BAE92730.1 3-hydroxy-3-methylglutaryl coenzyme A reductase [Gentiana lutea]	821.6	8.9e-237	sp|Q03163|HMDH_CATRO 3-hydroxy-3-methylglutaryl-coenzyme A reductase OS=Catharanthus roseus OX=4058 GN=HMGR PE=2 SV=1	741.9	1.3e-213	3-hydroxy-3-methylglutaryl-CoA (HMG-CoA) reductase	1.4e-242	844	;ko00900//Terpenoid backbone biosynthesis//Metabolism of terpenoids and polyketides//Metabolism	3-hydroxy-3-methylglutaryl-coenzyme A reductase 1; K00021 HMGCR; hydroxymethylglutaryl-CoA reductase (NADPH) [EC:1.1.1.34]	HMGCR
Isoform0012598	420.2	1.9e-114	BBE00754.1 3-hydroxy-3-methylglutaryl-CoA reductase [Nicotiana benthamiana]	396.7	6.9e-109	sp|A0A0A1C930|HMR2A_PANGI 3-hydroxy-3-methylglutaryl coenzyme A reductase 2-A OS=Panax ginseng OX=4054 GN=HMGR2 PE=2 SV=1	337.8	5.6e-92	3-hydroxy-3-methylglutaryl-CoA (HMG-CoA) reductase	5.4e-114	416.8	;ko00900//Terpenoid backbone biosynthesis//Metabolism of terpenoids and polyketides//Metabolism	3-hydroxy-3-methylglutaryl-coenzyme A reductase 1; K00021 HMGCR; hydroxymethylglutaryl-CoA reductase (NADPH) [EC:1.1.1.34]	HMGCR
Isoform0013850	734.6	4.4e-209	BAE92731.2 3-hydroxy-3-methylglutaryl coenzyme A reductase [Gentiana lutea]	708.8	7.9e-203	sp|Q03163|HMDH_CATRO 3-hydroxy-3-methylglutaryl-coenzyme A reductase OS=Catharanthus roseus OX=4058 GN=HMGR PE=2 SV=1	646.4	7.2e-185	3-hydroxy-3-methylglutaryl-CoA (HMG-CoA) reductase	6.9e-207	725.3	;ko00900//Terpenoid backbone biosynthesis//Metabolism of terpenoids and polyketides//Metabolism	3-hydroxy-3-methylglutaryl-coenzyme A reductase 1; K00021 HMGCR; hydroxymethylglutaryl-CoA reductase (NADPH) [EC:1.1.1.34]	HMGCR
Isoform0015847	556.6	1.5e-155	BBE00754.1 3-hydroxy-3-methylglutaryl-CoA reductase [Nicotiana benthamiana]	526.2	6.8e-148	sp|Q9XEL8|HMDH2_CAPAN 3-hydroxy-3-methylglutaryl-coenzyme A reductase 2 OS=Capsicum annuum OX=4072 GN=HMGR2 PE=2 SV=1	448	3.5e-125	3-hydroxy-3-methylglutaryl-CoA (HMG-CoA) reductase	6.1e-157	559.3	;ko00900//Terpenoid backbone biosynthesis//Metabolism of terpenoids and polyketides//Metabolism	3-hydroxy-3-methylglutaryl-coenzyme A reductase; K00021 HMGCR; hydroxymethylglutaryl-CoA reductase (NADPH) [EC:1.1.1.34]	HMGCR
Isoform0016129	848.2	2.6e-243	BAE92730.1 3-hydroxy-3-methylglutaryl coenzyme A reductase [Gentiana lutea]	821.6	7.9e-237	sp|Q03163|HMDH_CATRO 3-hydroxy-3-methylglutaryl-coenzyme A reductase OS=Catharanthus roseus OX=4058 GN=HMGR PE=2 SV=1	741.9	1.2e-213	3-hydroxy-3-methylglutaryl-CoA (HMG-CoA) reductase	4.7e-242	842	;ko00900//Terpenoid backbone biosynthesis//Metabolism of terpenoids and polyketides//Metabolism	3-hydroxy-3-methylglutaryl-coenzyme A reductase 1; K00021 HMGCR; hydroxymethylglutaryl-CoA reductase (NADPH) [EC:1.1.1.34]	HMGCR
Isoform0016625	993	6.2e-287	AFN89600.1 3-hydro-3-methylglutary CoA reductase [Gentiana macrophylla]	816.6	2.4e-235	sp|A0A0A1C930|HMR2A_PANGI 3-hydroxy-3-methylglutaryl coenzyme A reductase 2-A OS=Panax ginseng OX=4054 GN=HMGR2 PE=2 SV=1	805.4	8.4e-233	3-hydroxy-3-methylglutaryl-CoA (HMG-CoA) reductase	1.5e-248	863.6	;ko00900//Terpenoid backbone biosynthesis//Metabolism of terpenoids and polyketides//Metabolism	3-hydroxy-3-methylglutaryl-coenzyme A reductase 1-like; K00021 HMGCR; hydroxymethylglutaryl-CoA reductase (NADPH) [EC:1.1.1.34]	HMGCR
Isoform0017238	993	6.1e-287	AFN89600.1 3-hydro-3-methylglutary CoA reductase [Gentiana macrophylla]	816.6	2.4e-235	sp|A0A0A1C930|HMR2A_PANGI 3-hydroxy-3-methylglutaryl coenzyme A reductase 2-A OS=Panax ginseng OX=4054 GN=HMGR2 PE=2 SV=1	805.4	8.3e-233	3-hydroxy-3-methylglutaryl-CoA (HMG-CoA) reductase	1.4e-248	863.6	;ko00900//Terpenoid backbone biosynthesis//Metabolism of terpenoids and polyketides//Metabolism	3-hydroxy-3-methylglutaryl-coenzyme A reductase 1-like; K00021 HMGCR; hydroxymethylglutaryl-CoA reductase (NADPH) [EC:1.1.1.34]	HMGCR
Isoform0018502	535.8	2.6e-149	AFN89600.1 3-hydro-3-methylglutary CoA reductase [Gentiana macrophylla]	424.1	3.5e-117	sp|A0A0A1C3I2|HMGR1_PANGI 3-hydroxy-3-methylglutaryl coenzyme A reductase 1 OS=Panax ginseng OX=4054 GN=HMGR1 PE=2 SV=1	407.9	3.8e-113	3-hydroxy-3-methylglutaryl-CoA (HMG-CoA) reductase	1.9e-123	448	;ko00900//Terpenoid backbone biosynthesis//Metabolism of terpenoids and polyketides//Metabolism	3-hydroxy-3-methylglutaryl-coenzyme A reductase 1-like; K00021 HMGCR; hydroxymethylglutaryl-CoA reductase (NADPH) [EC:1.1.1.34]	HMGCR
Isoform0019108	921.4	2.2e-265	XP_027178782.1 3-hydroxy-3-methylglutaryl-coenzyme A reductase 1-like [Coffea eugenioides]	879.8	2.2e-254	sp|Q9XEL8|HMDH2_CAPAN 3-hydroxy-3-methylglutaryl-coenzyme A reductase 2 OS=Capsicum annuum OX=4072 GN=HMGR2 PE=2 SV=1	789.3	5.9e-228	3-hydroxy-3-methylglutaryl-CoA (HMG-CoA) reductase	2.8e-265	919.1	;ko00900//Terpenoid backbone biosynthesis//Metabolism of terpenoids and polyketides//Metabolism	3-hydroxy-3-methylglutaryl-coenzyme A reductase; K00021 HMGCR; hydroxymethylglutaryl-CoA reductase (NADPH) [EC:1.1.1.34]	HMGCR
Isoform0019253	922.2	1.3e-265	XP_027178782.1 3-hydroxy-3-methylglutaryl-coenzyme A reductase 1-like [Coffea eugenioides]	880.9	1e-254	sp|Q9XEL8|HMDH2_CAPAN 3-hydroxy-3-methylglutaryl-coenzyme A reductase 2 OS=Capsicum annuum OX=4072 GN=HMGR2 PE=2 SV=1	789.3	5.9e-228	3-hydroxy-3-methylglutaryl-CoA (HMG-CoA) reductase	9.6e-266	920.6	;ko00900//Terpenoid backbone biosynthesis//Metabolism of terpenoids and polyketides//Metabolism	3-hydroxy-3-methylglutaryl-coenzyme A reductase; K00021 HMGCR; hydroxymethylglutaryl-CoA reductase (NADPH) [EC:1.1.1.34]	HMGCR
Isoform0021056	921.4	2.1e-265	XP_027178782.1 3-hydroxy-3-methylglutaryl-coenzyme A reductase 1-like [Coffea eugenioides]	879.8	2.1e-254	sp|Q9XEL8|HMDH2_CAPAN 3-hydroxy-3-methylglutaryl-coenzyme A reductase 2 OS=Capsicum annuum OX=4072 GN=HMGR2 PE=2 SV=1	789.3	5.6e-228	3-hydroxy-3-methylglutaryl-CoA (HMG-CoA) reductase	2.6e-265	919.1	;ko00900//Terpenoid backbone biosynthesis//Metabolism of terpenoids and polyketides//Metabolism	3-hydroxy-3-methylglutaryl-coenzyme A reductase; K00021 HMGCR; hydroxymethylglutaryl-CoA reductase (NADPH) [EC:1.1.1.34]	HMGCR
Isoform0021347	805.8	1.3e-230	XP_027178782.1 3-hydroxy-3-methylglutaryl-coenzyme A reductase 1-like [Coffea eugenioides]	768.8	5.3e-221	sp|Q9XEL8|HMDH2_CAPAN 3-hydroxy-3-methylglutaryl-coenzyme A reductase 2 OS=Capsicum annuum OX=4072 GN=HMGR2 PE=2 SV=1	701.4	1.5e-201	3-hydroxy-3-methylglutaryl-CoA (HMG-CoA) reductase	2.6e-228	796.2	;ko00900//Terpenoid backbone biosynthesis//Metabolism of terpenoids and polyketides//Metabolism	3-hydroxy-3-methylglutaryl-coenzyme A reductase; K00021 HMGCR; hydroxymethylglutaryl-CoA reductase (NADPH) [EC:1.1.1.34]	HMGCR
Isoform0022297	891.3	2.2e-256	BAE92730.1 3-hydroxy-3-methylglutaryl coenzyme A reductase [Gentiana lutea]	845.9	3.3e-244	sp|P48020|HMDH1_SOLTU 3-hydroxy-3-methylglutaryl-coenzyme A reductase 1 OS=Solanum tuberosum OX=4113 GN=HMG1 PE=2 SV=1	758.8	7.9e-219	3-hydroxy-3-methylglutaryl-CoA (HMG-CoA) reductase	9.2e-247	857.4	;ko00900//Terpenoid backbone biosynthesis//Metabolism of terpenoids and polyketides//Metabolism	3-hydroxy-3-methylglutaryl-coenzyme A reductase 1; K00021 HMGCR; hydroxymethylglutaryl-CoA reductase (NADPH) [EC:1.1.1.34]	HMGCR
Isoform0022832	1070.1	3.4e-310	AFN89599.1 3-hydro-3-methylglutary CoA reductase [Gentiana macrophylla]	862.4	3.3e-249	sp|P48020|HMDH1_SOLTU 3-hydroxy-3-methylglutaryl-coenzyme A reductase 1 OS=Solanum tuberosum OX=4113 GN=HMG1 PE=2 SV=1	804.7	1.2e-232	3-hydroxy-3-methylglutaryl-CoA (HMG-CoA) reductase	9.6e-257	890.6	;ko00900//Terpenoid backbone biosynthesis//Metabolism of terpenoids and polyketides//Metabolism	3-hydroxy-3-methylglutaryl-coenzyme A reductase; K00021 HMGCR; hydroxymethylglutaryl-CoA reductase (NADPH) [EC:1.1.1.34]	HMGCR
Isoform0023274	921.4	1.9e-265	XP_027178782.1 3-hydroxy-3-methylglutaryl-coenzyme A reductase 1-like [Coffea eugenioides]	879.8	2e-254	sp|Q9XEL8|HMDH2_CAPAN 3-hydroxy-3-methylglutaryl-coenzyme A reductase 2 OS=Capsicum annuum OX=4072 GN=HMGR2 PE=2 SV=1	789.3	5.3e-228	3-hydroxy-3-methylglutaryl-CoA (HMG-CoA) reductase	2.5e-265	919.1	;ko00900//Terpenoid backbone biosynthesis//Metabolism of terpenoids and polyketides//Metabolism	3-hydroxy-3-methylglutaryl-coenzyme A reductase; K00021 HMGCR; hydroxymethylglutaryl-CoA reductase (NADPH) [EC:1.1.1.34]	HMGCR
Isoform0028718	729.6	8.8e-208	AJT35507.1 mevalonate kinase [Gentiana rigescens]	486.5	4e-136	sp|P46086|KIME_ARATH Mevalonate kinase OS=Arabidopsis thaliana OX=3702 GN=At5g27450 PE=2 SV=1	486.5	6e-137	Mevalonate kinase MVK/ERG12	3.9e-184	649	;ko00900//Terpenoid backbone biosynthesis//Metabolism of terpenoids and polyketides//Metabolism	mevalonate kinase-like; K00869 MVK; mevalonate kinase [EC:2.7.1.36]	MVK
Isoform0029989	729.6	8.1e-208	AJT35507.1 mevalonate kinase [Gentiana rigescens]	486.5	3.7e-136	sp|P46086|KIME_ARATH Mevalonate kinase OS=Arabidopsis thaliana OX=3702 GN=At5g27450 PE=2 SV=1	486.5	5.5e-137	Mevalonate kinase MVK/ERG12	3.6e-184	649	;ko00900//Terpenoid backbone biosynthesis//Metabolism of terpenoids and polyketides//Metabolism	mevalonate kinase-like; K00869 MVK; mevalonate kinase [EC:2.7.1.36]	MVK
Isoform0021063	524.2	7.4e-146	UES73136.1 phosphomevalonate kinase [Gymnema sylvestre]	460.3	4e-128	sp|Q9C6T1|PMK_ARATH Phosphomevalonate kinase, peroxisomal OS=Arabidopsis thaliana OX=3702 GN=PMK PE=1 SV=1	460.3	6e-129	Phosphomevalonate kinase	6.3e-142	509.2	;ko00900//Terpenoid backbone biosynthesis//Metabolism of terpenoids and polyketides//Metabolism	phosphomevalonate kinase; K00938 E2.7.4.2; phosphomevalonate kinase [EC:2.7.4.2]	PMK
Isoform0022565	767.7	3.7e-219	UES73136.1 phosphomevalonate kinase [Gymnema sylvestre]	658.7	7.4e-188	sp|Q9C6T1|PMK_ARATH Phosphomevalonate kinase, peroxisomal OS=Arabidopsis thaliana OX=3702 GN=PMK PE=1 SV=1	658.7	1.1e-188	Phosphomevalonate kinase	9.9e-209	731.1	;ko00900//Terpenoid backbone biosynthesis//Metabolism of terpenoids and polyketides//Metabolism	phosphomevalonate kinase; K00938 E2.7.4.2; phosphomevalonate kinase [EC:2.7.4.2]	PMK
Isoform0023073	797	5.6e-228	UES73136.1 phosphomevalonate kinase [Gymnema sylvestre]	668.7	7.1e-191	sp|Q9C6T1|PMK_ARATH Phosphomevalonate kinase, peroxisomal OS=Arabidopsis thaliana OX=3702 GN=PMK PE=1 SV=1	668.7	1e-191	Phosphomevalonate kinase	1.5e-214	750.4	;ko00900//Terpenoid backbone biosynthesis//Metabolism of terpenoids and polyketides//Metabolism	phosphomevalonate kinase-like; K00938 E2.7.4.2; phosphomevalonate kinase [EC:2.7.4.2]	PMK
Isoform0024647	797	5.3e-228	UES73136.1 phosphomevalonate kinase [Gymnema sylvestre]	668.7	6.7e-191	sp|Q9C6T1|PMK_ARATH Phosphomevalonate kinase, peroxisomal OS=Arabidopsis thaliana OX=3702 GN=PMK PE=1 SV=1	668.7	1e-191	Phosphomevalonate kinase	1.5e-214	750.4	;ko00900//Terpenoid backbone biosynthesis//Metabolism of terpenoids and polyketides//Metabolism	phosphomevalonate kinase-like; K00938 E2.7.4.2; phosphomevalonate kinase [EC:2.7.4.2]	PMK
Isoform0028760	831.6	1.6e-238	AJT35509.1 pyrophosphomevalonate decarboxylase [Gentiana rigescens]	700.7	1.3e-200	sp|F8QQQ7|MVD2_PANGI Diphosphomevalonate decarboxylase 2 OS=Panax ginseng OX=4054 GN=MVD2 PE=2 SV=1	674.1	2e-193	Mevalonate pyrophosphate decarboxylase	5e-216	755	;ko00900//Terpenoid backbone biosynthesis//Metabolism of terpenoids and polyketides//Metabolism	diphosphomevalonate decarboxylase MVD2-like; K01597 MVD; diphosphomevalonate decarboxylase [EC:4.1.1.33]	MVD
Isoform0014975	681.8	3.3e-193	AJT35509.1 pyrophosphomevalonate decarboxylase [Gentiana rigescens]	552.4	9.2e-156	sp|F8QQQ7|MVD2_PANGI Diphosphomevalonate decarboxylase 2 OS=Panax ginseng OX=4054 GN=MVD2 PE=2 SV=1	525.8	1.4e-148	Mevalonate pyrophosphate decarboxylase	1e-170	605.1	;ko00900//Terpenoid backbone biosynthesis//Metabolism of terpenoids and polyketides//Metabolism	diphosphomevalonate decarboxylase MVD2-like; K01597 MVD; diphosphomevalonate decarboxylase [EC:4.1.1.33]	MVD
Isoform0032003	477.2	5.4e-132	AJG03074.1 IDI1 [Gentiana rigescens]	442.6	4.6e-123	sp|O48964|IDI1_CAMAC Isopentenyl-diphosphate Delta-isomerase I OS=Camptotheca acuminata OX=16922 GN=IPI1 PE=2 SV=1	426.8	3.9e-119	Isopentenyl pyrophosphate:dimethylallyl pyrophosphate isomerase	8.2e-125	451.4	;ko00900//Terpenoid backbone biosynthesis//Metabolism of terpenoids and polyketides//Metabolism	isopentenyl-diphosphate Delta-isomerase I; K01823 idi; isopentenyl-diphosphate Delta-isomerase [EC:5.3.3.2]	IDI
Isoform0032164	476.1	1.1e-131	AJG03074.1 IDI1 [Gentiana rigescens]	441.4	9.2e-123	sp|O48964|IDI1_CAMAC Isopentenyl-diphosphate Delta-isomerase I OS=Camptotheca acuminata OX=16922 GN=IPI1 PE=2 SV=1	427.2	2.7e-119	Isopentenyl pyrophosphate:dimethylallyl pyrophosphate isomerase	5.7e-125	451.8	;ko00900//Terpenoid backbone biosynthesis//Metabolism of terpenoids and polyketides//Metabolism	isopentenyl-diphosphate Delta-isomerase I; K01823 idi; isopentenyl-diphosphate Delta-isomerase [EC:5.3.3.2]	IDI
Isoform0011522	971.8	1.7e-280	CDP04804.1 unnamed protein product [Coffea canephora]	696.4	4.3e-199	sp|O78328|DXS_CAPAN Probable 1-deoxy-D-xylulose-5-phosphate synthase, chloroplastic OS=Capsicum annuum OX=4072 GN=TKT2 PE=2 SV=1	843.2	4.3e-244	Transketolase	3.4e-273	945.7	;ko00730//Thiamine metabolism//Metabolism of cofactors and vitamins//Metabolism	probable 1-deoxy-D-xylulose-5-phosphate synthase; K01662 dxs; 1-deoxy-D-xylulose-5-phosphate synthase [EC:2.2.1.7]	DXS
Isoform0012685	1311.2	0	XP_027121155.1 probable 1-deoxy-D-xylulose-5-phosphate synthase, chloroplastic [Coffea arabica]	1274.6	0	sp|O78328|DXS_CAPAN Probable 1-deoxy-D-xylulose-5-phosphate synthase, chloroplastic OS=Capsicum annuum OX=4072 GN=TKT2 PE=2 SV=1	1207.2	0	Transketolase	0	1285	;ko00730//Thiamine metabolism//Metabolism of cofactors and vitamins//Metabolism	probable 1-deoxy-D-xylulose-5-phosphate synthase; K01662 dxs; 1-deoxy-D-xylulose-5-phosphate synthase [EC:2.2.1.7]	DXS
Isoform0013195	954.5	2.7e-275	CDP04804.1 unnamed protein product [Coffea canephora]	696.4	4.1e-199	sp|O78328|DXS_CAPAN Probable 1-deoxy-D-xylulose-5-phosphate synthase, chloroplastic OS=Capsicum annuum OX=4072 GN=TKT2 PE=2 SV=1	841.3	1.5e-243	Transketolase	8.3e-269	931	;ko00730//Thiamine metabolism//Metabolism of cofactors and vitamins//Metabolism	probable 1-deoxy-D-xylulose-5-phosphate synthase; K01662 dxs; 1-deoxy-D-xylulose-5-phosphate synthase [EC:2.2.1.7]	DXS
Isoform0013207	1229.9	0	XP_027165775.1 probable 1-deoxy-D-xylulose-5-phosphate synthase, chloroplastic [Coffea eugenioides]	1204.9	0	sp|O78328|DXS_CAPAN Probable 1-deoxy-D-xylulose-5-phosphate synthase, chloroplastic OS=Capsicum annuum OX=4072 GN=TKT2 PE=2 SV=1	1154.8	0	Transketolase	0	1218.8	;ko00730//Thiamine metabolism//Metabolism of cofactors and vitamins//Metabolism	probable 1-deoxy-D-xylulose-5-phosphate synthase; K01662 dxs; 1-deoxy-D-xylulose-5-phosphate synthase [EC:2.2.1.7]	DXS
Isoform0013427	1394.8	0	AKN79613.1 DXS [Gentiana rigescens]	1164.4	0	sp|Q6YU51|DXS2_ORYSJ Probable 1-deoxy-D-xylulose-5-phosphate synthase 2, chloroplastic OS=Oryza sativa subsp. japonica OX=39947 GN=Os07g0190000 PE=2 SV=1	1020.4	1.8e-297	Transketolase	0	1240.7	;ko00730//Thiamine metabolism//Metabolism of cofactors and vitamins//Metabolism	probable 1-deoxy-D-xylulose-5-phosphate synthase 2; K01662 dxs; 1-deoxy-D-xylulose-5-phosphate synthase [EC:2.2.1.7]	DXS
Isoform0014005	971.5	2.1e-280	CDP04804.1 unnamed protein product [Coffea canephora]	696.4	4.1e-199	sp|O78328|DXS_CAPAN Probable 1-deoxy-D-xylulose-5-phosphate synthase, chloroplastic OS=Capsicum annuum OX=4072 GN=TKT2 PE=2 SV=1	842.8	5.2e-244	Transketolase	4.2e-273	945.3	;ko00730//Thiamine metabolism//Metabolism of cofactors and vitamins//Metabolism	probable 1-deoxy-D-xylulose-5-phosphate synthase; K01662 dxs; 1-deoxy-D-xylulose-5-phosphate synthase [EC:2.2.1.7]	DXS
Isoform0014148	1399.4	0	AKN79613.1 DXS [Gentiana rigescens]	1164.4	0	sp|Q6YU51|DXS2_ORYSJ Probable 1-deoxy-D-xylulose-5-phosphate synthase 2, chloroplastic OS=Oryza sativa subsp. japonica OX=39947 GN=Os07g0190000 PE=2 SV=1	1020.4	1.8e-297	Transketolase	0	1245	;ko00730//Thiamine metabolism//Metabolism of cofactors and vitamins//Metabolism	probable 1-deoxy-D-xylulose-5-phosphate synthase 2; K01662 dxs; 1-deoxy-D-xylulose-5-phosphate synthase [EC:2.2.1.7]	DXS
Isoform0014187	1311.2	0	XP_027121155.1 probable 1-deoxy-D-xylulose-5-phosphate synthase, chloroplastic [Coffea arabica]	1274.6	0	sp|O78328|DXS_CAPAN Probable 1-deoxy-D-xylulose-5-phosphate synthase, chloroplastic OS=Capsicum annuum OX=4072 GN=TKT2 PE=2 SV=1	1207.6	0	Transketolase	0	1285	;ko00730//Thiamine metabolism//Metabolism of cofactors and vitamins//Metabolism	probable 1-deoxy-D-xylulose-5-phosphate synthase; K01662 dxs; 1-deoxy-D-xylulose-5-phosphate synthase [EC:2.2.1.7]	DXS
Isoform0014591	1230.3	0	XP_027165775.1 probable 1-deoxy-D-xylulose-5-phosphate synthase, chloroplastic [Coffea eugenioides]	1204.9	0	sp|O78328|DXS_CAPAN Probable 1-deoxy-D-xylulose-5-phosphate synthase, chloroplastic OS=Capsicum annuum OX=4072 GN=TKT2 PE=2 SV=1	1155.2	0	Transketolase	0	1218.8	;ko00730//Thiamine metabolism//Metabolism of cofactors and vitamins//Metabolism	probable 1-deoxy-D-xylulose-5-phosphate synthase; K01662 dxs; 1-deoxy-D-xylulose-5-phosphate synthase [EC:2.2.1.7]	DXS
Isoform0015050	1311.6	0	XP_027121155.1 probable 1-deoxy-D-xylulose-5-phosphate synthase, chloroplastic [Coffea arabica]	1275	0	sp|O78328|DXS_CAPAN Probable 1-deoxy-D-xylulose-5-phosphate synthase, chloroplastic OS=Capsicum annuum OX=4072 GN=TKT2 PE=2 SV=1	1207.6	0	Transketolase	0	1285.4	;ko00730//Thiamine metabolism//Metabolism of cofactors and vitamins//Metabolism	probable 1-deoxy-D-xylulose-5-phosphate synthase; K01662 dxs; 1-deoxy-D-xylulose-5-phosphate synthase [EC:2.2.1.7]	DXS
Isoform0015348	1311.2	0	XP_027121155.1 probable 1-deoxy-D-xylulose-5-phosphate synthase, chloroplastic [Coffea arabica]	1274.6	0	sp|O78328|DXS_CAPAN Probable 1-deoxy-D-xylulose-5-phosphate synthase, chloroplastic OS=Capsicum annuum OX=4072 GN=TKT2 PE=2 SV=1	1207.6	0	Transketolase	0	1285	;ko00730//Thiamine metabolism//Metabolism of cofactors and vitamins//Metabolism	probable 1-deoxy-D-xylulose-5-phosphate synthase; K01662 dxs; 1-deoxy-D-xylulose-5-phosphate synthase [EC:2.2.1.7]	DXS
Isoform0016211	1229.9	0	XP_027165775.1 probable 1-deoxy-D-xylulose-5-phosphate synthase, chloroplastic [Coffea eugenioides]	1204.9	0	sp|O78328|DXS_CAPAN Probable 1-deoxy-D-xylulose-5-phosphate synthase, chloroplastic OS=Capsicum annuum OX=4072 GN=TKT2 PE=2 SV=1	1154.8	0	Transketolase	0	1218.8	;ko00730//Thiamine metabolism//Metabolism of cofactors and vitamins//Metabolism	probable 1-deoxy-D-xylulose-5-phosphate synthase; K01662 dxs; 1-deoxy-D-xylulose-5-phosphate synthase [EC:2.2.1.7]	DXS
Isoform0016420	1401	0	AKN79613.1 DXS [Gentiana rigescens]	1164.4	0	sp|Q6YU51|DXS2_ORYSJ Probable 1-deoxy-D-xylulose-5-phosphate synthase 2, chloroplastic OS=Oryza sativa subsp. japonica OX=39947 GN=Os07g0190000 PE=2 SV=1	1020.4	1.7e-297	Transketolase	0	1246.5	;ko00730//Thiamine metabolism//Metabolism of cofactors and vitamins//Metabolism	probable 1-deoxy-D-xylulose-5-phosphate synthase 2; K01662 dxs; 1-deoxy-D-xylulose-5-phosphate synthase [EC:2.2.1.7]	DXS
Isoform0022657	917.5	2.8e-264	AIA82922.1 DXR [Gentiana rigescens]	793.5	1.9e-228	sp|Q8W250|DXR_ORYSJ 1-deoxy-D-xylulose 5-phosphate reductoisomerase, chloroplastic OS=Oryza sativa subsp. japonica OX=39947 GN=DXR PE=2 SV=2	--	--	--	7.3e-241	837.8	;ko00900//Terpenoid backbone biosynthesis//Metabolism of terpenoids and polyketides//Metabolism	1-deoxy-D-xylulose 5-phosphate reductoisomerase; K00099 dxr; 1-deoxy-D-xylulose-5-phosphate reductoisomerase [EC:1.1.1.267]	DXR
Isoform0022849	919.8	5.6e-265	AIA82922.1 DXR [Gentiana rigescens]	793.1	2.4e-228	sp|Q8W250|DXR_ORYSJ 1-deoxy-D-xylulose 5-phosphate reductoisomerase, chloroplastic OS=Oryza sativa subsp. japonica OX=39947 GN=DXR PE=2 SV=2	--	--	--	1.4e-241	840.1	;ko00900//Terpenoid backbone biosynthesis//Metabolism of terpenoids and polyketides//Metabolism	1-deoxy-D-xylulose 5-phosphate reductoisomerase; K00099 dxr; 1-deoxy-D-xylulose-5-phosphate reductoisomerase [EC:1.1.1.267]	DXR
Isoform0022979	917.9	2.2e-264	AIA82922.1 DXR [Gentiana rigescens]	793.5	1.9e-228	sp|Q8W250|DXR_ORYSJ 1-deoxy-D-xylulose 5-phosphate reductoisomerase, chloroplastic OS=Oryza sativa subsp. japonica OX=39947 GN=DXR PE=2 SV=2	--	--	--	5.6e-241	838.2	;ko00900//Terpenoid backbone biosynthesis//Metabolism of terpenoids and polyketides//Metabolism	1-deoxy-D-xylulose 5-phosphate reductoisomerase; K00099 dxr; 1-deoxy-D-xylulose-5-phosphate reductoisomerase [EC:1.1.1.267]	DXR
Isoform0024628	917.1	3.5e-264	AIA82922.1 DXR [Gentiana rigescens]	793.1	2.4e-228	sp|Q8W250|DXR_ORYSJ 1-deoxy-D-xylulose 5-phosphate reductoisomerase, chloroplastic OS=Oryza sativa subsp. japonica OX=39947 GN=DXR PE=2 SV=2	--	--	--	9.1e-241	837.4	;ko00900//Terpenoid backbone biosynthesis//Metabolism of terpenoids and polyketides//Metabolism	1-deoxy-D-xylulose 5-phosphate reductoisomerase; K00099 dxr; 1-deoxy-D-xylulose-5-phosphate reductoisomerase [EC:1.1.1.267]	DXR
Isoform0024709	580.1	1e-162	AIA82922.1 DXR [Gentiana rigescens]	550.8	2e-155	sp|Q8W250|DXR_ORYSJ 1-deoxy-D-xylulose 5-phosphate reductoisomerase, chloroplastic OS=Oryza sativa subsp. japonica OX=39947 GN=DXR PE=2 SV=2	--	--	--	2.8e-157	560.1	;ko00900//Terpenoid backbone biosynthesis//Metabolism of terpenoids and polyketides//Metabolism	1-deoxy-D-xylulose 5-phosphate reductoisomerase; K00099 dxr; 1-deoxy-D-xylulose-5-phosphate reductoisomerase [EC:1.1.1.267]	DXR
Isoform0025181	917.1	3.4e-264	AIA82922.1 DXR [Gentiana rigescens]	793.1	2.3e-228	sp|Q8W250|DXR_ORYSJ 1-deoxy-D-xylulose 5-phosphate reductoisomerase, chloroplastic OS=Oryza sativa subsp. japonica OX=39947 GN=DXR PE=2 SV=2	--	--	--	8.9e-241	837.4	;ko00900//Terpenoid backbone biosynthesis//Metabolism of terpenoids and polyketides//Metabolism	1-deoxy-D-xylulose 5-phosphate reductoisomerase; K00099 dxr; 1-deoxy-D-xylulose-5-phosphate reductoisomerase [EC:1.1.1.267]	DXR
Isoform0025299	805.8	1.1e-230	AIA82922.1 DXR [Gentiana rigescens]	762.7	3.3e-219	sp|Q8W250|DXR_ORYSJ 1-deoxy-D-xylulose 5-phosphate reductoisomerase, chloroplastic OS=Oryza sativa subsp. japonica OX=39947 GN=DXR PE=2 SV=2	--	--	--	5.1e-220	768.5	;ko00900//Terpenoid backbone biosynthesis//Metabolism of terpenoids and polyketides//Metabolism	DXR; 1-deoxy-D-xylulose-5-phosphate reductoisomerase; K00099 dxr; 1-deoxy-D-xylulose-5-phosphate reductoisomerase [EC:1.1.1.267]	DXR
Isoform0026878	919.8	5e-265	AIA82922.1 DXR [Gentiana rigescens]	793.1	2.2e-228	sp|Q8W250|DXR_ORYSJ 1-deoxy-D-xylulose 5-phosphate reductoisomerase, chloroplastic OS=Oryza sativa subsp. japonica OX=39947 GN=DXR PE=2 SV=2	--	--	--	1.3e-241	840.1	;ko00900//Terpenoid backbone biosynthesis//Metabolism of terpenoids and polyketides//Metabolism	1-deoxy-D-xylulose 5-phosphate reductoisomerase; K00099 dxr; 1-deoxy-D-xylulose-5-phosphate reductoisomerase [EC:1.1.1.267]	DXR
Isoform0029817	646.4	9.2e-183	XP_027161506.1 4-diphosphocytidyl-2-C-methyl-D-erythritol kinase, chloroplastic/chromoplastic [Coffea eugenioides]	579.7	3.3e-164	sp|P93841|ISPE_SOLLC 4-diphosphocytidyl-2-C-methyl-D-erythritol kinase, chloroplastic/chromoplastic (Fragment) OS=Solanum lycopersicum OX=4081 GN=ISPE PE=1 SV=1	--	--	--	1.7e-173	613.6	;ko00900//Terpenoid backbone biosynthesis//Metabolism of terpenoids and polyketides//Metabolism	4-diphosphocytidyl-2-C-methyl-D-erythritol kinase; K00919 ispE; 4-diphosphocytidyl-2-C-methyl-D-erythritol kinase [EC:2.7.1.148]	ISPE
Isoform0010065	1370.5	0	XP_027180347.1 4-hydroxy-3-methylbut-2-en-1-yl diphosphate synthase (ferredoxin), chloroplastic [Coffea eugenioides]	1275.8	0	sp|F4K0E8|ISPG_ARATH 4-hydroxy-3-methylbut-2-en-1-yl diphosphate synthase (ferredoxin), chloroplastic OS=Arabidopsis thaliana OX=3702 GN=ISPG PE=1 SV=1	--	--	--	0	1332.4	;ko00900//Terpenoid backbone biosynthesis//Metabolism of terpenoids and polyketides//Metabolism	4-hydroxy-3-methylbut-2-en-1-yl diphosphate synthase (ferredoxin); K03526 gcpE; (E)-4-hydroxy-3-methylbut-2-enyl-diphosphate synthase [EC:1.17.7.1 1.17.7.3]	GCPE
Isoform0010233	486.1	2.9e-134	XP_027180347.1 4-hydroxy-3-methylbut-2-en-1-yl diphosphate synthase (ferredoxin), chloroplastic [Coffea eugenioides]	444.5	2.9e-123	sp|F4K0E8|ISPG_ARATH 4-hydroxy-3-methylbut-2-en-1-yl diphosphate synthase (ferredoxin), chloroplastic OS=Arabidopsis thaliana OX=3702 GN=ISPG PE=1 SV=1	--	--	--	8.4e-131	472.6	;ko00900//Terpenoid backbone biosynthesis//Metabolism of terpenoids and polyketides//Metabolism	4-hydroxy-3-methylbut-2-en-1-yl diphosphate synthase (ferredoxin); K03526 gcpE; (E)-4-hydroxy-3-methylbut-2-enyl-diphosphate synthase [EC:1.17.7.1 1.17.7.3]	GCPE
Isoform0010932	1370.1	0	XP_027180347.1 4-hydroxy-3-methylbut-2-en-1-yl diphosphate synthase (ferredoxin), chloroplastic [Coffea eugenioides]	1275.4	0	sp|F4K0E8|ISPG_ARATH 4-hydroxy-3-methylbut-2-en-1-yl diphosphate synthase (ferredoxin), chloroplastic OS=Arabidopsis thaliana OX=3702 GN=ISPG PE=1 SV=1	--	--	--	0	1332	;ko00900//Terpenoid backbone biosynthesis//Metabolism of terpenoids and polyketides//Metabolism	4-hydroxy-3-methylbut-2-en-1-yl diphosphate synthase (ferredoxin); K03526 gcpE; (E)-4-hydroxy-3-methylbut-2-enyl-diphosphate synthase [EC:1.17.7.1 1.17.7.3]	GCPE
Isoform0011117	1370.9	0	XP_027180347.1 4-hydroxy-3-methylbut-2-en-1-yl diphosphate synthase (ferredoxin), chloroplastic [Coffea eugenioides]	1276.2	0	sp|F4K0E8|ISPG_ARATH 4-hydroxy-3-methylbut-2-en-1-yl diphosphate synthase (ferredoxin), chloroplastic OS=Arabidopsis thaliana OX=3702 GN=ISPG PE=1 SV=1	--	--	--	0	1332.8	;ko00900//Terpenoid backbone biosynthesis//Metabolism of terpenoids and polyketides//Metabolism	4-hydroxy-3-methylbut-2-en-1-yl diphosphate synthase (ferredoxin); K03526 gcpE; (E)-4-hydroxy-3-methylbut-2-enyl-diphosphate synthase [EC:1.17.7.1 1.17.7.3]	GCPE
Isoform0011328	1370.5	0	XP_027180347.1 4-hydroxy-3-methylbut-2-en-1-yl diphosphate synthase (ferredoxin), chloroplastic [Coffea eugenioides]	1275.8	0	sp|F4K0E8|ISPG_ARATH 4-hydroxy-3-methylbut-2-en-1-yl diphosphate synthase (ferredoxin), chloroplastic OS=Arabidopsis thaliana OX=3702 GN=ISPG PE=1 SV=1	--	--	--	0	1332.4	;ko00900//Terpenoid backbone biosynthesis//Metabolism of terpenoids and polyketides//Metabolism	4-hydroxy-3-methylbut-2-en-1-yl diphosphate synthase (ferredoxin); K03526 gcpE; (E)-4-hydroxy-3-methylbut-2-enyl-diphosphate synthase [EC:1.17.7.1 1.17.7.3]	GCPE
Isoform0011974	1370.5	0	XP_027180347.1 4-hydroxy-3-methylbut-2-en-1-yl diphosphate synthase (ferredoxin), chloroplastic [Coffea eugenioides]	1275.8	0	sp|F4K0E8|ISPG_ARATH 4-hydroxy-3-methylbut-2-en-1-yl diphosphate synthase (ferredoxin), chloroplastic OS=Arabidopsis thaliana OX=3702 GN=ISPG PE=1 SV=1	--	--	--	0	1332.4	;ko00900//Terpenoid backbone biosynthesis//Metabolism of terpenoids and polyketides//Metabolism	4-hydroxy-3-methylbut-2-en-1-yl diphosphate synthase (ferredoxin); K03526 gcpE; (E)-4-hydroxy-3-methylbut-2-enyl-diphosphate synthase [EC:1.17.7.1 1.17.7.3]	GCPE
Isoform0011998	1370.1	0	XP_027180347.1 4-hydroxy-3-methylbut-2-en-1-yl diphosphate synthase (ferredoxin), chloroplastic [Coffea eugenioides]	1275.4	0	sp|F4K0E8|ISPG_ARATH 4-hydroxy-3-methylbut-2-en-1-yl diphosphate synthase (ferredoxin), chloroplastic OS=Arabidopsis thaliana OX=3702 GN=ISPG PE=1 SV=1	--	--	--	0	1332	;ko00900//Terpenoid backbone biosynthesis//Metabolism of terpenoids and polyketides//Metabolism	4-hydroxy-3-methylbut-2-en-1-yl diphosphate synthase (ferredoxin); K03526 gcpE; (E)-4-hydroxy-3-methylbut-2-enyl-diphosphate synthase [EC:1.17.7.1 1.17.7.3]	GCPE
Isoform0012387	1369.8	0	XP_027180347.1 4-hydroxy-3-methylbut-2-en-1-yl diphosphate synthase (ferredoxin), chloroplastic [Coffea eugenioides]	1275	0	sp|F4K0E8|ISPG_ARATH 4-hydroxy-3-methylbut-2-en-1-yl diphosphate synthase (ferredoxin), chloroplastic OS=Arabidopsis thaliana OX=3702 GN=ISPG PE=1 SV=1	--	--	--	0	1331.6	;ko00900//Terpenoid backbone biosynthesis//Metabolism of terpenoids and polyketides//Metabolism	4-hydroxy-3-methylbut-2-en-1-yl diphosphate synthase (ferredoxin); K03526 gcpE; (E)-4-hydroxy-3-methylbut-2-enyl-diphosphate synthase [EC:1.17.7.1 1.17.7.3]	GCPE
Isoform0012399	1370.5	0	XP_027180347.1 4-hydroxy-3-methylbut-2-en-1-yl diphosphate synthase (ferredoxin), chloroplastic [Coffea eugenioides]	1275.8	0	sp|F4K0E8|ISPG_ARATH 4-hydroxy-3-methylbut-2-en-1-yl diphosphate synthase (ferredoxin), chloroplastic OS=Arabidopsis thaliana OX=3702 GN=ISPG PE=1 SV=1	--	--	--	0	1332.4	;ko00900//Terpenoid backbone biosynthesis//Metabolism of terpenoids and polyketides//Metabolism	4-hydroxy-3-methylbut-2-en-1-yl diphosphate synthase (ferredoxin); K03526 gcpE; (E)-4-hydroxy-3-methylbut-2-enyl-diphosphate synthase [EC:1.17.7.1 1.17.7.3]	GCPE
Isoform0012403	1370.1	0	XP_027180347.1 4-hydroxy-3-methylbut-2-en-1-yl diphosphate synthase (ferredoxin), chloroplastic [Coffea eugenioides]	1275.4	0	sp|F4K0E8|ISPG_ARATH 4-hydroxy-3-methylbut-2-en-1-yl diphosphate synthase (ferredoxin), chloroplastic OS=Arabidopsis thaliana OX=3702 GN=ISPG PE=1 SV=1	--	--	--	0	1332	;ko00900//Terpenoid backbone biosynthesis//Metabolism of terpenoids and polyketides//Metabolism	4-hydroxy-3-methylbut-2-en-1-yl diphosphate synthase (ferredoxin); K03526 gcpE; (E)-4-hydroxy-3-methylbut-2-enyl-diphosphate synthase [EC:1.17.7.1 1.17.7.3]	GCPE
Isoform0013732	1370.9	0	XP_027180347.1 4-hydroxy-3-methylbut-2-en-1-yl diphosphate synthase (ferredoxin), chloroplastic [Coffea eugenioides]	1276.2	0	sp|F4K0E8|ISPG_ARATH 4-hydroxy-3-methylbut-2-en-1-yl diphosphate synthase (ferredoxin), chloroplastic OS=Arabidopsis thaliana OX=3702 GN=ISPG PE=1 SV=1	--	--	--	0	1332.8	;ko00900//Terpenoid backbone biosynthesis//Metabolism of terpenoids and polyketides//Metabolism	4-hydroxy-3-methylbut-2-en-1-yl diphosphate synthase (ferredoxin); K03526 gcpE; (E)-4-hydroxy-3-methylbut-2-enyl-diphosphate synthase [EC:1.17.7.1 1.17.7.3]	GCPE
Isoform0014253	1370.5	0	XP_027180347.1 4-hydroxy-3-methylbut-2-en-1-yl diphosphate synthase (ferredoxin), chloroplastic [Coffea eugenioides]	1275.8	0	sp|F4K0E8|ISPG_ARATH 4-hydroxy-3-methylbut-2-en-1-yl diphosphate synthase (ferredoxin), chloroplastic OS=Arabidopsis thaliana OX=3702 GN=ISPG PE=1 SV=1	--	--	--	0	1332.4	;ko00900//Terpenoid backbone biosynthesis//Metabolism of terpenoids and polyketides//Metabolism	4-hydroxy-3-methylbut-2-en-1-yl diphosphate synthase (ferredoxin); K03526 gcpE; (E)-4-hydroxy-3-methylbut-2-enyl-diphosphate synthase [EC:1.17.7.1 1.17.7.3]	GCPE
Isoform0014599	1370.5	0	XP_027180347.1 4-hydroxy-3-methylbut-2-en-1-yl diphosphate synthase (ferredoxin), chloroplastic [Coffea eugenioides]	1275.8	0	sp|F4K0E8|ISPG_ARATH 4-hydroxy-3-methylbut-2-en-1-yl diphosphate synthase (ferredoxin), chloroplastic OS=Arabidopsis thaliana OX=3702 GN=ISPG PE=1 SV=1	--	--	--	0	1332.4	;ko00900//Terpenoid backbone biosynthesis//Metabolism of terpenoids and polyketides//Metabolism	4-hydroxy-3-methylbut-2-en-1-yl diphosphate synthase (ferredoxin); K03526 gcpE; (E)-4-hydroxy-3-methylbut-2-enyl-diphosphate synthase [EC:1.17.7.1 1.17.7.3]	GCPE
Isoform0014857	1340.1	0	XP_027180347.1 4-hydroxy-3-methylbut-2-en-1-yl diphosphate synthase (ferredoxin), chloroplastic [Coffea eugenioides]	1260.4	0	sp|F4K0E8|ISPG_ARATH 4-hydroxy-3-methylbut-2-en-1-yl diphosphate synthase (ferredoxin), chloroplastic OS=Arabidopsis thaliana OX=3702 GN=ISPG PE=1 SV=1	--	--	--	0	1302.7	;ko00900//Terpenoid backbone biosynthesis//Metabolism of terpenoids and polyketides//Metabolism	4-hydroxy-3-methylbut-2-en-1-yl diphosphate synthase (ferredoxin); K03526 gcpE; (E)-4-hydroxy-3-methylbut-2-enyl-diphosphate synthase [EC:1.17.7.1 1.17.7.3]	GCPE
Isoform0015374	1370.5	0	XP_027180347.1 4-hydroxy-3-methylbut-2-en-1-yl diphosphate synthase (ferredoxin), chloroplastic [Coffea eugenioides]	1275.8	0	sp|F4K0E8|ISPG_ARATH 4-hydroxy-3-methylbut-2-en-1-yl diphosphate synthase (ferredoxin), chloroplastic OS=Arabidopsis thaliana OX=3702 GN=ISPG PE=1 SV=1	--	--	--	0	1332.4	;ko00900//Terpenoid backbone biosynthesis//Metabolism of terpenoids and polyketides//Metabolism	4-hydroxy-3-methylbut-2-en-1-yl diphosphate synthase (ferredoxin); K03526 gcpE; (E)-4-hydroxy-3-methylbut-2-enyl-diphosphate synthase [EC:1.17.7.1 1.17.7.3]	GCPE
Isoform0018905	1028.5	1.1e-297	XP_027180347.1 4-hydroxy-3-methylbut-2-en-1-yl diphosphate synthase (ferredoxin), chloroplastic [Coffea eugenioides]	974.2	7.9e-283	sp|F4K0E8|ISPG_ARATH 4-hydroxy-3-methylbut-2-en-1-yl diphosphate synthase (ferredoxin), chloroplastic OS=Arabidopsis thaliana OX=3702 GN=ISPG PE=1 SV=1	--	--	--	3.9e-290	1001.5	;ko00900//Terpenoid backbone biosynthesis//Metabolism of terpenoids and polyketides//Metabolism	4-hydroxy-3-methylbut-2-en-1-yl diphosphate synthase (ferredoxin); K03526 gcpE; (E)-4-hydroxy-3-methylbut-2-enyl-diphosphate synthase [EC:1.17.7.1 1.17.7.3]	GCPE
Isoform0019326	1174.1	0	XP_027180347.1 4-hydroxy-3-methylbut-2-en-1-yl diphosphate synthase (ferredoxin), chloroplastic [Coffea eugenioides]	1116.7	0	sp|F4K0E8|ISPG_ARATH 4-hydroxy-3-methylbut-2-en-1-yl diphosphate synthase (ferredoxin), chloroplastic OS=Arabidopsis thaliana OX=3702 GN=ISPG PE=1 SV=1	--	--	--	0	1146.3	;ko00900//Terpenoid backbone biosynthesis//Metabolism of terpenoids and polyketides//Metabolism	4-hydroxy-3-methylbut-2-en-1-yl diphosphate synthase (ferredoxin); K03526 gcpE; (E)-4-hydroxy-3-methylbut-2-enyl-diphosphate synthase [EC:1.17.7.1 1.17.7.3]	GCPE
Isoform0021479	632.9	1.5e-178	XP_027107885.1 LOW QUALITY PROTEIN: 4-hydroxy-3-methylbut-2-en-1-yl diphosphate synthase (ferredoxin), chloroplastic-like [Coffea arabica]	590.5	2.6e-167	sp|F4K0E8|ISPG_ARATH 4-hydroxy-3-methylbut-2-en-1-yl diphosphate synthase (ferredoxin), chloroplastic OS=Arabidopsis thaliana OX=3702 GN=ISPG PE=1 SV=1	--	--	--	6.6e-176	622.1	;ko00900//Terpenoid backbone biosynthesis//Metabolism of terpenoids and polyketides//Metabolism	4-hydroxy-3-methylbut-2-en-1-yl diphosphate synthase (ferredoxin); K03526 gcpE; (E)-4-hydroxy-3-methylbut-2-enyl-diphosphate synthase [EC:1.17.7.1 1.17.7.3]	GCPE
Isoform0025366	634.4	4.4e-179	XP_027107885.1 LOW QUALITY PROTEIN: 4-hydroxy-3-methylbut-2-en-1-yl diphosphate synthase (ferredoxin), chloroplastic-like [Coffea arabica]	592	7.8e-168	sp|F4K0E8|ISPG_ARATH 4-hydroxy-3-methylbut-2-en-1-yl diphosphate synthase (ferredoxin), chloroplastic OS=Arabidopsis thaliana OX=3702 GN=ISPG PE=1 SV=1	--	--	--	2e-176	623.6	;ko00900//Terpenoid backbone biosynthesis//Metabolism of terpenoids and polyketides//Metabolism	4-hydroxy-3-methylbut-2-en-1-yl diphosphate synthase (ferredoxin); K03526 gcpE; (E)-4-hydroxy-3-methylbut-2-enyl-diphosphate synthase [EC:1.17.7.1 1.17.7.3]	GCPE
Isoform0026276	933.7	3.3e-269	AIP91968.1 1-hydroxy-2-methyl-2-(E)-butenyl-4-diphosphate reductase [Gentiana macrophylla]	750	2.1e-215	sp|Q94B35|ISPH_ARATH 4-hydroxy-3-methylbut-2-enyl diphosphate reductase, chloroplastic OS=Arabidopsis thaliana OX=3702 GN=ISPH PE=1 SV=1	--	--	--	3e-230	802.4	;ko00900//Terpenoid backbone biosynthesis//Metabolism of terpenoids and polyketides//Metabolism	4-hydroxy-3-methylbut-2-enyl diphosphate reductase; K03527 ispH; 4-hydroxy-3-methylbut-2-en-1-yl diphosphate reductase [EC:1.17.7.4]	ISPH
Isoform0026439	275	6.4e-71	AIP91968.1 1-hydroxy-2-methyl-2-(E)-butenyl-4-diphosphate reductase [Gentiana macrophylla]	226.1	1.1e-57	sp|Q94B35|ISPH_ARATH 4-hydroxy-3-methylbut-2-enyl diphosphate reductase, chloroplastic OS=Arabidopsis thaliana OX=3702 GN=ISPH PE=1 SV=1	--	--	--	2.2e-60	238	;ko00900//Terpenoid backbone biosynthesis//Metabolism of terpenoids and polyketides//Metabolism	4-hydroxy-3-methylbut-2-enyl diphosphate reductase; K03527 ispH; 4-hydroxy-3-methylbut-2-en-1-yl diphosphate reductase [EC:1.17.7.4]	ISPH
Isoform0026778	931.8	1.3e-268	AIP91968.1 1-hydroxy-2-methyl-2-(E)-butenyl-4-diphosphate reductase [Gentiana macrophylla]	748	8.1e-215	sp|Q94B35|ISPH_ARATH 4-hydroxy-3-methylbut-2-enyl diphosphate reductase, chloroplastic OS=Arabidopsis thaliana OX=3702 GN=ISPH PE=1 SV=1	--	--	--	8.8e-230	800.8	;ko00900//Terpenoid backbone biosynthesis//Metabolism of terpenoids and polyketides//Metabolism	4-hydroxy-3-methylbut-2-enyl diphosphate reductase; K03527 ispH; 4-hydroxy-3-methylbut-2-en-1-yl diphosphate reductase [EC:1.17.7.4]	ISPH
Isoform0029895	934.1	2.2e-269	AIP91968.1 1-hydroxy-2-methyl-2-(E)-butenyl-4-diphosphate reductase [Gentiana macrophylla]	750.4	1.4e-215	sp|Q94B35|ISPH_ARATH 4-hydroxy-3-methylbut-2-enyl diphosphate reductase, chloroplastic OS=Arabidopsis thaliana OX=3702 GN=ISPH PE=1 SV=1	--	--	--	1.5e-230	803.1	;ko00900//Terpenoid backbone biosynthesis//Metabolism of terpenoids and polyketides//Metabolism	4-hydroxy-3-methylbut-2-enyl diphosphate reductase; K03527 ispH; 4-hydroxy-3-methylbut-2-en-1-yl diphosphate reductase [EC:1.17.7.4]	ISPH
Isoform0019838	1195.6	0	AKJ26123.1 CYP6 [Gentiana rigescens]	973.4	1.5e-282	sp|Q9SB48|NCPR1_ARATH NADPH--cytochrome P450 reductase 1 OS=Arabidopsis thaliana OX=3702 GN=ATR1 PE=1 SV=1	973.4	2.2e-283	NADP/FAD dependent oxidoreductase	8.5e-299	1030.4	--	NADPH--cytochrome P450 reductase-like; K00327 POR; NADPH-ferrihemoprotein reductase [EC:1.6.2.4]	POR
Isoform0021768	1019.6	5.5e-295	XP_027176985.1 NADPH--cytochrome P450 reductase [Coffea eugenioides]	985.3	3.5e-286	sp|Q05001|NCPR_CATRO NADPH--cytochrome P450 reductase OS=Catharanthus roseus OX=4058 GN=CPR PE=2 SV=1	918.7	6.1e-267	NADP/FAD dependent oxidoreductase	1.6e-291	1006.1	--	NADPH--cytochrome P450 reductase-like; K00327 POR; NADPH-ferrihemoprotein reductase [EC:1.6.2.4]	POR
Isoform0022202	1090.1	0	AKJ26123.1 CYP6 [Gentiana rigescens]	883.2	1.9e-255	sp|Q9SB48|NCPR1_ARATH NADPH--cytochrome P450 reductase 1 OS=Arabidopsis thaliana OX=3702 GN=ATR1 PE=1 SV=1	883.2	2.8e-256	NADP/FAD dependent oxidoreductase	1.1e-268	930.2	--	NADPH--cytochrome P450 reductase; K00327 POR; NADPH-ferrihemoprotein reductase [EC:1.6.2.4]	POR
Isoform0023228	152.5	5.5e-34	KAA3490334.1 NADPH--cytochrome P450 reductase 2 [Gossypium australe]	141.4	3.9e-32	sp|Q05001|NCPR_CATRO NADPH--cytochrome P450 reductase OS=Catharanthus roseus OX=4058 GN=CPR PE=2 SV=1	129	3e-29	NADP/FAD dependent oxidoreductase	4.1e-34	151	--	NADPH--cytochrome P450 reductase-like; K00327 POR; NADPH-ferrihemoprotein reductase [EC:1.6.2.4]	POR
Isoform0024301	1078.2	0	XP_027176985.1 NADPH--cytochrome P450 reductase [Coffea eugenioides]	1042.7	1.7e-303	sp|Q05001|NCPR_CATRO NADPH--cytochrome P450 reductase OS=Catharanthus roseus OX=4058 GN=CPR PE=2 SV=1	974.2	1.1e-283	NADP/FAD dependent oxidoreductase	2.3e-308	1062	--	NADPH--cytochrome P450 reductase-like; K00327 POR; NADPH-ferrihemoprotein reductase [EC:1.6.2.4]	POR
Isoform0018739	348.6	5.9e-93	AIA22172.1 10HGO [Gentiana rigescens]	328.2	2.5e-88	sp|Q6V4H0|10HGO_CATRO 8-hydroxygeraniol dehydrogenase OS=Catharanthus roseus OX=4058 GN=10HGO PE=1 SV=1	254.2	6.9e-67	Alcohol dehydrogenase, class V	3.5e-82	310.8	;ko00902//Monoterpenoid biosynthesis//Metabolism of terpenoids and polyketides//Metabolism	8-hydroxygeraniol dehydrogenase; K23232 10HGO; 8-hydroxygeraniol dehydrogenase [EC:1.1.1.324]	10HGO
Isoform0022447	340.5	1.4e-90	AIA22172.1 10HGO [Gentiana rigescens]	323.9	4.3e-87	sp|Q6V4H0|10HGO_CATRO 8-hydroxygeraniol dehydrogenase OS=Catharanthus roseus OX=4058 GN=10HGO PE=1 SV=1	251.1	5.3e-66	Alcohol dehydrogenase, class V	1.7e-80	305.1	;ko00902//Monoterpenoid biosynthesis//Metabolism of terpenoids and polyketides//Metabolism	8-hydroxygeraniol dehydrogenase-like; K23232 10HGO; 8-hydroxygeraniol dehydrogenase [EC:1.1.1.324]	10HGO
Isoform0029345	595.1	2.5e-167	KAA8531460.1 hypothetical protein F0562_006187 [Nyssa sinensis]	578.2	9.6e-164	sp|Q6V4H0|10HGO_CATRO 8-hydroxygeraniol dehydrogenase OS=Catharanthus roseus OX=4058 GN=10HGO PE=1 SV=1	518.5	1.3e-146	Alcohol dehydrogenase, class V	--	--	--	8-hydroxygeraniol dehydrogenase-like; K23232 10HGO; 8-hydroxygeraniol dehydrogenase [EC:1.1.1.324]	10HGO
Isoform0030333	705.7	1.2e-200	AIA22172.1 10HGO [Gentiana rigescens]	648.3	6.9e-185	sp|Q6V4H0|10HGO_CATRO 8-hydroxygeraniol dehydrogenase OS=Catharanthus roseus OX=4058 GN=10HGO PE=1 SV=1	511.9	1.1e-144	Alcohol dehydrogenase, class V	3.1e-177	625.9	;ko00902//Monoterpenoid biosynthesis//Metabolism of terpenoids and polyketides//Metabolism	8-hydroxygeraniol dehydrogenase; K23232 10HGO; 8-hydroxygeraniol dehydrogenase [EC:1.1.1.324]	10HGO
Isoform0030838	672.5	1e-190	AIA22172.1 10HGO [Gentiana rigescens]	634.8	7.2e-181	sp|Q6V4H0|10HGO_CATRO 8-hydroxygeraniol dehydrogenase OS=Catharanthus roseus OX=4058 GN=10HGO PE=1 SV=1	502.3	8.2e-142	Alcohol dehydrogenase, class V	6.4e-174	614.8	;ko00902//Monoterpenoid biosynthesis//Metabolism of terpenoids and polyketides//Metabolism	8-hydroxygeraniol dehydrogenase; K23232 10HGO; 8-hydroxygeraniol dehydrogenase [EC:1.1.1.324]	10HGO
Isoform0030856	715.7	1.1e-203	AIA22172.1 10HGO [Gentiana rigescens]	657.9	8.3e-188	sp|Q6V4H0|10HGO_CATRO 8-hydroxygeraniol dehydrogenase OS=Catharanthus roseus OX=4058 GN=10HGO PE=1 SV=1	517.7	2e-146	Alcohol dehydrogenase, class V	2e-181	639.8	;ko00902//Monoterpenoid biosynthesis//Metabolism of terpenoids and polyketides//Metabolism	8-hydroxygeraniol dehydrogenase; K23232 10HGO; 8-hydroxygeraniol dehydrogenase [EC:1.1.1.324]	10HGO
Isoform0031137	659.4	9e-187	Q6V4H0.1 RecName: Full=8-hydroxygeraniol dehydrogenase; Short=Cr10HGO [Catharanthus roseus]	659.4	2.8e-188	sp|Q6V4H0|10HGO_CATRO 8-hydroxygeraniol dehydrogenase OS=Catharanthus roseus OX=4058 GN=10HGO PE=1 SV=1	520.8	2.3e-147	Alcohol dehydrogenase, class V	6.1e-180	634.8	;ko00902//Monoterpenoid biosynthesis//Metabolism of terpenoids and polyketides//Metabolism	8-hydroxygeraniol dehydrogenase; K23232 10HGO; 8-hydroxygeraniol dehydrogenase [EC:1.1.1.324]	10HGO
Isoform0031369	705.7	1.1e-200	AIA22172.1 10HGO [Gentiana rigescens]	648.3	6.3e-185	sp|Q6V4H0|10HGO_CATRO 8-hydroxygeraniol dehydrogenase OS=Catharanthus roseus OX=4058 GN=10HGO PE=1 SV=1	511.9	1.1e-144	Alcohol dehydrogenase, class V	2.8e-177	625.9	;ko00902//Monoterpenoid biosynthesis//Metabolism of terpenoids and polyketides//Metabolism	8-hydroxygeraniol dehydrogenase; K23232 10HGO; 8-hydroxygeraniol dehydrogenase [EC:1.1.1.324]	10HGO
Isoform0028938	667.5	4.1e-189	ASK39428.1 Iridoid Synthase [Swertia mussotii]	602.8	3.8e-171	sp|A0A221J5X3|ISY1_NEPRA (S)-8-oxocitronellyl enol synthase ISY1 OS=Nepeta racemosa OX=54731 GN=ISY1 PE=1 SV=1	--	--	--	1.2e-188	664.1	--	3-oxo-Delta(4; K22419 VEP1; Delta4-3-oxosteroid 5beta-reductase [EC:1.3.1.3]	ISY1
Isoform0029727	663.7	5.6e-188	ASK39428.1 Iridoid Synthase [Swertia mussotii]	600.5	1.8e-170	sp|A0A221J5X3|ISY1_NEPRA (S)-8-oxocitronellyl enol synthase ISY1 OS=Nepeta racemosa OX=54731 GN=ISY1 PE=1 SV=1	--	--	--	1.6e-187	660.2	--	3-oxo-Delta(4; K22419 VEP1; Delta4-3-oxosteroid 5beta-reductase [EC:1.3.1.3]	ISY1
Isoform0029767	663.7	5.6e-188	ASK39428.1 Iridoid Synthase [Swertia mussotii]	600.5	1.8e-170	sp|A0A221J5X3|ISY1_NEPRA (S)-8-oxocitronellyl enol synthase ISY1 OS=Nepeta racemosa OX=54731 GN=ISY1 PE=1 SV=1	--	--	--	1.6e-187	660.2	--	3-oxo-Delta(4; K22419 VEP1; Delta4-3-oxosteroid 5beta-reductase [EC:1.3.1.3]	ISY1
Isoform0030191	663.7	5.2e-188	ASK39428.1 Iridoid Synthase [Swertia mussotii]	600.5	1.7e-170	sp|A0A221J5X3|ISY1_NEPRA (S)-8-oxocitronellyl enol synthase ISY1 OS=Nepeta racemosa OX=54731 GN=ISY1 PE=1 SV=1	--	--	--	1.5e-187	660.2	--	3-oxo-Delta(4; K22419 VEP1; Delta4-3-oxosteroid 5beta-reductase [EC:1.3.1.3]	ISY1
Isoform0030571	753.1	6.5e-215	ASK39428.1 Iridoid Synthase [Swertia mussotii]	658.3	6.7e-188	sp|A0A221J5X3|ISY1_NEPRA (S)-8-oxocitronellyl enol synthase ISY1 OS=Nepeta racemosa OX=54731 GN=ISY1 PE=1 SV=1	--	--	--	1.7e-191	673.3	--	3-oxo-Delta(4; K22419 VEP1; Delta4-3-oxosteroid 5beta-reductase [EC:1.3.1.3]	ISY1
Isoform0024149	969.5	5.9e-280	AKI87772.1 IDO-1 [Gentiana rigescens]	939.9	1.5e-272	sp|W8JIS5|IO_CATRO Iridoid oxidase OS=Catharanthus roseus OX=4058 GN=IO PE=1 SV=1	429.1	1.3e-119	Cytochrome P450 CYP2 subfamily	1.5e-240	836.6	;ko00902//Monoterpenoid biosynthesis//Metabolism of terpenoids and polyketides//Metabolism	cytochrome P450 76A1-like; K20618 CYP76A26; nepetalactol monooxygenase [EC:1.14.14.161]	7-DLS
Isoform0024992	969.5	5.9e-280	AKI87772.1 IDO-1 [Gentiana rigescens]	939.9	1.5e-272	sp|W8JIS5|IO_CATRO Iridoid oxidase OS=Catharanthus roseus OX=4058 GN=IO PE=1 SV=1	429.1	1.3e-119	Cytochrome P450 CYP2 subfamily	1.5e-240	836.6	;ko00902//Monoterpenoid biosynthesis//Metabolism of terpenoids and polyketides//Metabolism	cytochrome P450 76A1-like; K20618 CYP76A26; nepetalactol monooxygenase [EC:1.14.14.161]	7-DLS
Isoform0031167	433.7	7.7e-119	XP_027170519.1 protein STRICTOSIDINE SYNTHASE-LIKE 12-like [Coffea eugenioides]	236.1	7.2e-61	sp|P94111|SSL12_ARATH Protein STRICTOSIDINE SYNTHASE-LIKE 12 OS=Arabidopsis thaliana OX=3702 GN=SSL12 PE=2 SV=2	236.1	1.1e-61	Predicted alkaloid synthase/Surface mucin Hemomucin	--	--	--	protein STRICTOSIDINE SYNTHASE-LIKE 11-like; K01757 STR1; strictosidine synthase [EC:4.3.3.2]	STR1
Isoform0031423	436	1.5e-119	XP_027170519.1 protein STRICTOSIDINE SYNTHASE-LIKE 12-like [Coffea eugenioides]	236.1	7.1e-61	sp|P94111|SSL12_ARATH Protein STRICTOSIDINE SYNTHASE-LIKE 12 OS=Arabidopsis thaliana OX=3702 GN=SSL12 PE=2 SV=2	236.1	1.1e-61	Predicted alkaloid synthase/Surface mucin Hemomucin	--	--	--	protein STRICTOSIDINE SYNTHASE-LIKE 11-like; K01757 STR1; strictosidine synthase [EC:4.3.3.2]	STR1
Isoform0016385	178.3	1.1e-41	QEY10182.1 geranylgeranyl pyrophosphate synthase [Scutellaria barbata]	147.1	8.6e-34	sp|Q39108|GGR_ARATH Heterodimeric geranylgeranyl pyrophosphate synthase small subunit, chloroplastic OS=Arabidopsis thaliana OX=3702 GN=GGR PE=1 SV=2	147.1	1.3e-34	Geranylgeranyl pyrophosphate synthase/Polyprenyl synthetase	1.1e-41	176.4	;ko00900//Terpenoid backbone biosynthesis//Metabolism of terpenoids and polyketides//Metabolism	heterodimeric geranylgeranyl pyrophosphate synthase small subunit; K13789 GGPS; geranylgeranyl diphosphate synthase, type II [EC:2.5.1.1 2.5.1.10 2.5.1.29]	GGPS
Isoform0027670	533.5	9.4e-149	CAA2982044.1 heterodimeric geranylgeranyl pyrophosphate synthase small subunit, chloroplastic-like [Olea europaea subsp. europaea] [Olea europaea]	414.1	2.6e-114	sp|Q39108|GGR_ARATH Heterodimeric geranylgeranyl pyrophosphate synthase small subunit, chloroplastic OS=Arabidopsis thaliana OX=3702 GN=GGR PE=1 SV=2	414.1	3.8e-115	Geranylgeranyl pyrophosphate synthase/Polyprenyl synthetase	4.6e-148	529.3	;ko00900//Terpenoid backbone biosynthesis//Metabolism of terpenoids and polyketides//Metabolism	heterodimeric geranylgeranyl pyrophosphate synthase small subunit; K13789 GGPS; geranylgeranyl diphosphate synthase, type II [EC:2.5.1.1 2.5.1.10 2.5.1.29]	GGPS
Isoform0028091	526.2	1.5e-146	AMK51093.1 chloroplast geranylgeranyl pyrophosphate synthase 1 [Rehmannia glutinosa]	413.3	4.4e-114	sp|Q39108|GGR_ARATH Heterodimeric geranylgeranyl pyrophosphate synthase small subunit, chloroplastic OS=Arabidopsis thaliana OX=3702 GN=GGR PE=1 SV=2	413.3	6.6e-115	Geranylgeranyl pyrophosphate synthase/Polyprenyl synthetase	5.7e-146	522.3	;ko00900//Terpenoid backbone biosynthesis//Metabolism of terpenoids and polyketides//Metabolism	heterodimeric geranylgeranyl pyrophosphate synthase small subunit; K13789 GGPS; geranylgeranyl diphosphate synthase, type II [EC:2.5.1.1 2.5.1.10 2.5.1.29]	GGPS
Isoform0028274	526.6	1.1e-146	AMK51093.1 chloroplast geranylgeranyl pyrophosphate synthase 1 [Rehmannia glutinosa]	413.3	4.2e-114	sp|Q39108|GGR_ARATH Heterodimeric geranylgeranyl pyrophosphate synthase small subunit, chloroplastic OS=Arabidopsis thaliana OX=3702 GN=GGR PE=1 SV=2	413.3	6.3e-115	Geranylgeranyl pyrophosphate synthase/Polyprenyl synthetase	5.4e-146	522.3	;ko00900//Terpenoid backbone biosynthesis//Metabolism of terpenoids and polyketides//Metabolism	heterodimeric geranylgeranyl pyrophosphate synthase small subunit; K13789 GGPS; geranylgeranyl diphosphate synthase, type II [EC:2.5.1.1 2.5.1.10 2.5.1.29]	GGPS
Isoform0028602	526.2	1.5e-146	AMK51093.1 chloroplast geranylgeranyl pyrophosphate synthase 1 [Rehmannia glutinosa]	413.3	4.3e-114	sp|Q39108|GGR_ARATH Heterodimeric geranylgeranyl pyrophosphate synthase small subunit, chloroplastic OS=Arabidopsis thaliana OX=3702 GN=GGR PE=1 SV=2	413.3	6.4e-115	Geranylgeranyl pyrophosphate synthase/Polyprenyl synthetase	5.5e-146	522.3	;ko00900//Terpenoid backbone biosynthesis//Metabolism of terpenoids and polyketides//Metabolism	heterodimeric geranylgeranyl pyrophosphate synthase small subunit; K13789 GGPS; geranylgeranyl diphosphate synthase, type II [EC:2.5.1.1 2.5.1.10 2.5.1.29]	GGPS
Isoform0030969	695.7	1.2e-197	ALS54746.1 geranyl diphosphate synthase large subunit [Gentiana rigescens]	547.7	1.2e-154	sp|Q42698|GGPPS_CATRO Geranylgeranyl pyrophosphate synthase, chloroplastic OS=Catharanthus roseus OX=4058 GN=GGPS1 PE=3 SV=1	469.5	6.3e-132	Geranylgeranyl pyrophosphate synthase/Polyprenyl synthetase	1.2e-146	524.2	;ko00900//Terpenoid backbone biosynthesis//Metabolism of terpenoids and polyketides//Metabolism	geranylgeranyl pyrophosphate synthase; K13789 GGPS; geranylgeranyl diphosphate synthase, type II [EC:2.5.1.1 2.5.1.10 2.5.1.29]	GGPS
Isoform0009580	178.3	1.4e-41	QEY10182.1 geranylgeranyl pyrophosphate synthase [Scutellaria barbata]	147.1	1e-33	sp|Q39108|GGR_ARATH Heterodimeric geranylgeranyl pyrophosphate synthase small subunit, chloroplastic OS=Arabidopsis thaliana OX=3702 GN=GGR PE=1 SV=2	147.1	1.5e-34	Geranylgeranyl pyrophosphate synthase/Polyprenyl synthetase	1.3e-41	176.4	;ko00900//Terpenoid backbone biosynthesis//Metabolism of terpenoids and polyketides//Metabolism	heterodimeric geranylgeranyl pyrophosphate synthase small subunit; K13789 GGPS; geranylgeranyl diphosphate synthase, type II [EC:2.5.1.1 2.5.1.10 2.5.1.29]	GGPS
Isoform0010735	178.3	1.3e-41	QEY10182.1 geranylgeranyl pyrophosphate synthase [Scutellaria barbata]	147.1	1e-33	sp|Q39108|GGR_ARATH Heterodimeric geranylgeranyl pyrophosphate synthase small subunit, chloroplastic OS=Arabidopsis thaliana OX=3702 GN=GGR PE=1 SV=2	147.1	1.5e-34	Geranylgeranyl pyrophosphate synthase/Polyprenyl synthetase	1.3e-41	176.4	;ko00900//Terpenoid backbone biosynthesis//Metabolism of terpenoids and polyketides//Metabolism	heterodimeric geranylgeranyl pyrophosphate synthase small subunit; K13789 GGPS; geranylgeranyl diphosphate synthase, type II [EC:2.5.1.1 2.5.1.10 2.5.1.29]	GGPS
Isoform0027756	633.6	6.9e-179	XP_027185499.1 solanesyl diphosphate synthase 3, chloroplastic/mitochondrial isoform X1 [Coffea eugenioides]	511.9	9.4e-144	sp|Q653T6|SPS1_ORYSJ Solanesyl-diphosphate synthase 1, mitochondrial OS=Oryza sativa subsp. japonica OX=39947 GN=SPS1 PE=1 SV=1	411.4	2.6e-114	Geranylgeranyl pyrophosphate synthase/Polyprenyl synthetase	9.5e-173	611.3	;ko00900//Terpenoid backbone biosynthesis//Metabolism of terpenoids and polyketides//Metabolism	solanesyl diphosphate synthase 3; K14066 GPS; geranyl diphosphate synthase [EC:2.5.1.1]	GPPS
Isoform0030732	631.3	2.8e-178	XP_027185499.1 solanesyl diphosphate synthase 3, chloroplastic/mitochondrial isoform X1 [Coffea eugenioides]	510.8	1.7e-143	sp|Q653T6|SPS1_ORYSJ Solanesyl-diphosphate synthase 1, mitochondrial OS=Oryza sativa subsp. japonica OX=39947 GN=SPS1 PE=1 SV=1	409.1	1e-113	Geranylgeranyl pyrophosphate synthase/Polyprenyl synthetase	3.9e-172	609	;ko00900//Terpenoid backbone biosynthesis//Metabolism of terpenoids and polyketides//Metabolism	solanesyl diphosphate synthase 3; K14066 GPS; geranyl diphosphate synthase [EC:2.5.1.1]	GPPS
